# Supplementary material for: Atmospheric-pressure ionization and fragmentation of peptides by solution-cathode glow discharge
Source: PubMed Central journal article supplement — Chem Sci. 2016 Jun 27;7(10):6440–9. doi: 10.1039/c6sc02032a (PMC5356034; doi:10.1039/c6sc02032a), 2016-06-27
Supplement: SC-007-C6SC02032A-s001.pdf [file SC-007-C6SC02032A-s001.pdf]

## Electronic Supplemental Material for

### Atmospheric-Pressure Ionization and Fragmentation of Peptides by Solution-Cathode Glow Discharge

**Authors:** Andrew J. Schwartz,<sup>1</sup> Jacob T. Shelley,<sup>2\*</sup> Courtney L. Walton,<sup>2</sup> Kelsey L. Williams,<sup>2</sup> and Gary M. Hieftje<sup>1</sup>

**Affiliations:** <sup>1</sup>Department of Chemistry, Indiana University, Bloomington, IN 47405, USA and <sup>2</sup>Department of Chemistry and Biochemistry, Kent State University, Kent, OH, 44242, USA

\* Correspondence to: Jacob T. Shelley, Email: [jshelley@kent.edu](mailto:jshelley@kent.edu), Tel.: (+1) 330-672-2986

#### **Table of Contents:**

- Extension of Supplemental Experimental information regarding instrumentation and operating conditions used for ESI-tandem MS measurements.
- Figure S1: Schematic diagram of the compact solution-cathode glow discharge (SCGD) cell utilized for mass spectrometry experiments.
- Figure S2: Diagram of the inlet capillary position with respect to the SCGD.
- Figure S3: MS/MS spectra of various peptides obtained with ESI-CID. For each peptide, the target parent ion was the doubly protonated, doubly charged molecular ion, except in the case of angiotensin I and SAMS peptide, where the triply protonated, triply charged precursor was selected. Sequence coverage, compared to SCGD-MS, is summarized in Table 1.

## Experimental Section (continued)

### ESI-Tandem MS

All peptides analyzed with SCGD-MS were also subjected to more conventional ionization and fragmentation approaches on two different mass spectrometers. In both cases, solutions containing 1  $\mu\text{g/mL}$  of each peptide were dissolved in HPLC-MS grade water. Flow injection of a 5- $\mu\text{L}$  plug of peptide solution was carried to a heated ESI source (HESI II probe, Thermo Scientific, San Jose, CA) with 50  $\mu\text{L/min}$  carrier flow of 50% methanol, 25% water, and 0.1% TFA. The carrier solvent flow was delivered by a binary liquid chromatograph pump (model HPG-3400RS, Thermo Scientific, San Jose, CA) after passing through a vacuum degasser (model SRD-3600, Thermo Scientific, San Jose, CA).

Low-resolution ESI tandem mass spectra were acquired with a Thermo Scientific LTQ XL linear ion trap (San Jose, CA). The source was operated at 4 kV with a sheath gas flow rate and gas-heater temperature of 20 (manufacturer's units) and 50  $^{\circ}\text{C}$ , respectively, to cope with the relatively high liquid flow rates. Spectra were collected in automatic gain-control mode with a maximum ion-trap injection time of 100 ms and 1 microscan per spectrum. The key experimental parameters for positive-ion detection were: capillary temperature 310  $^{\circ}\text{C}$ ; capillary voltage 20 V; tube lens 85 V. Tandem mass spectrometry ( $\text{MS}^n$ ) was performed *via* collision-induced dissociation (CID) after isolation of either the  $\text{MH}_2^{2+}$  or  $\text{MH}_3^{3+}$  ion. These tandem mass spectra were obtained with an isolation window of 1.5 Th and 20% relative collision energy.

High-resolution ESI mass spectra were acquired with an Exactive Plus Orbitrap mass spectrometer (Thermo Scientific, Bremen, Germany). Fragmentation of all ions (*i.e.* without isolation) was performed through in-source collision-induced dissociation with energies between 20 and 40 eV. The in-source CID occurs within the vacuum system of the mass spectrometer through a DC voltage offset between the entrance ion optics and the transfer optics. All spectra were recorded with a mass resolving power setting of 140,000 and an automatic gain control (AGC) target value of  $1 \times 10^6$  ions. To ensure high mass accuracy, better than 1 ppm, the instrument was mass calibrated daily and a lock mass of  $m/z$  371.10124, due to polysiloxane, was used throughout.

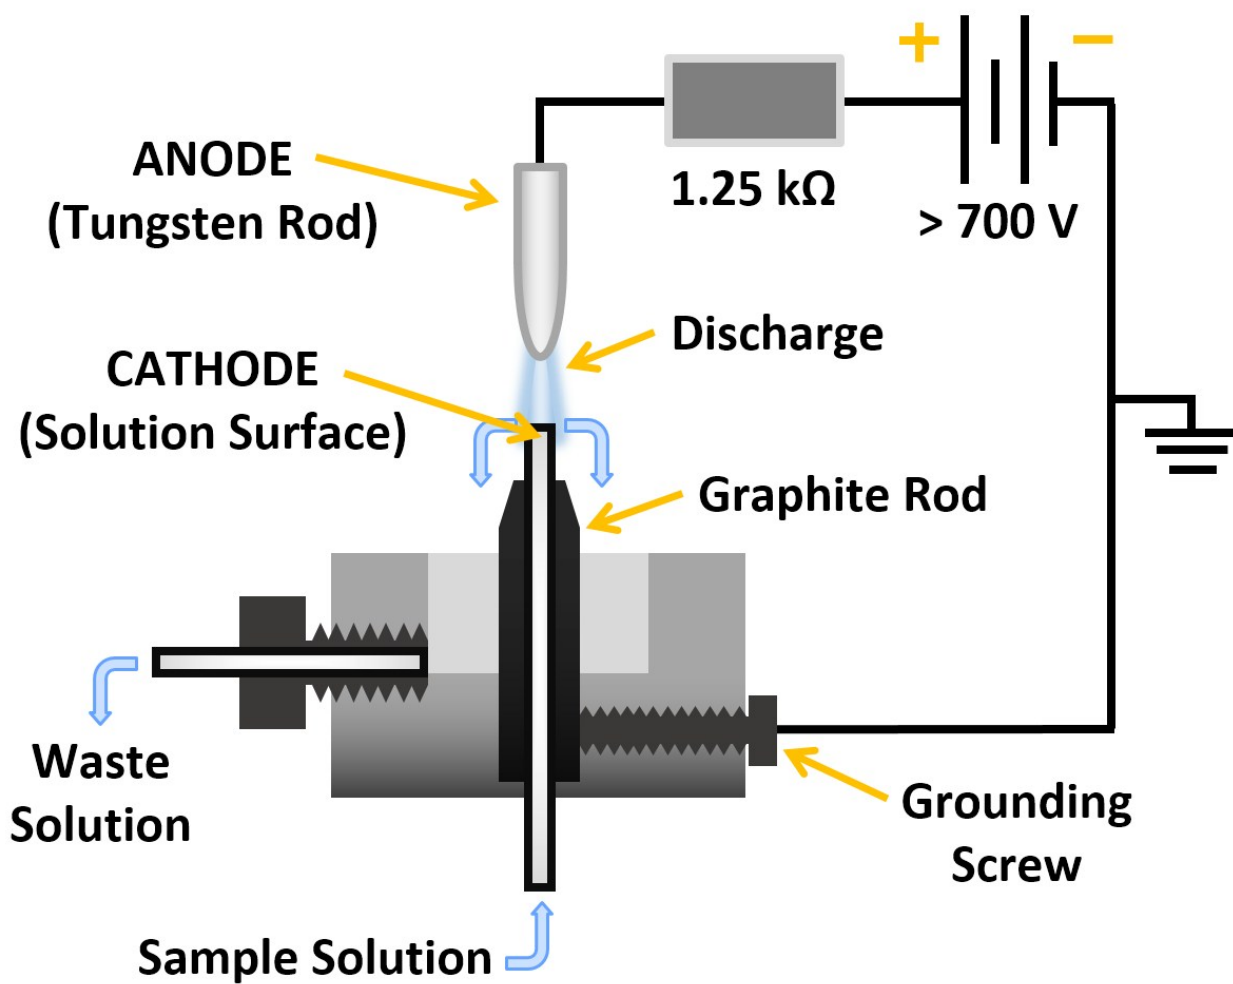

**Figure S1.** Schematic diagram of the compact solution-cathode glow discharge cell utilized for mass spectrometry experiments.

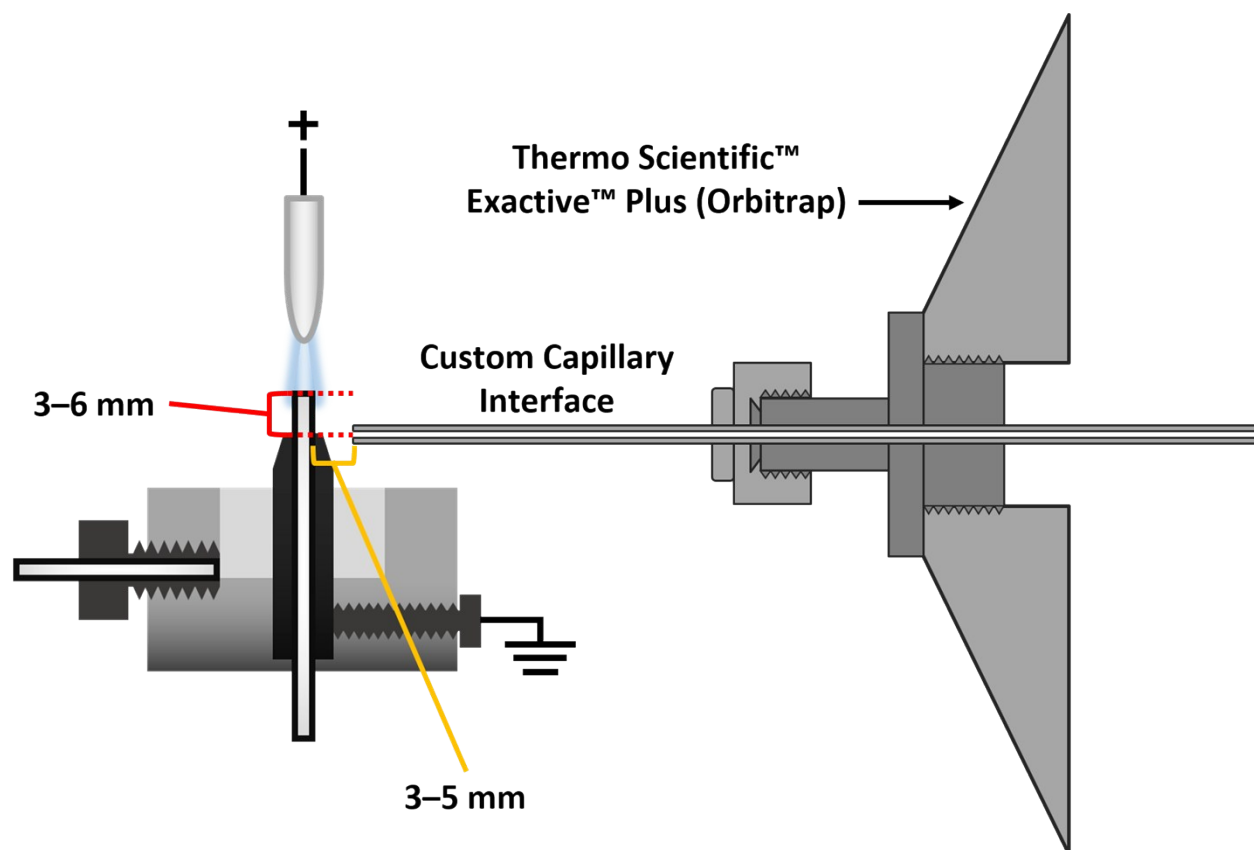

**Figure S2.** Diagram of the inlet capillary position with respect to the SCGD.

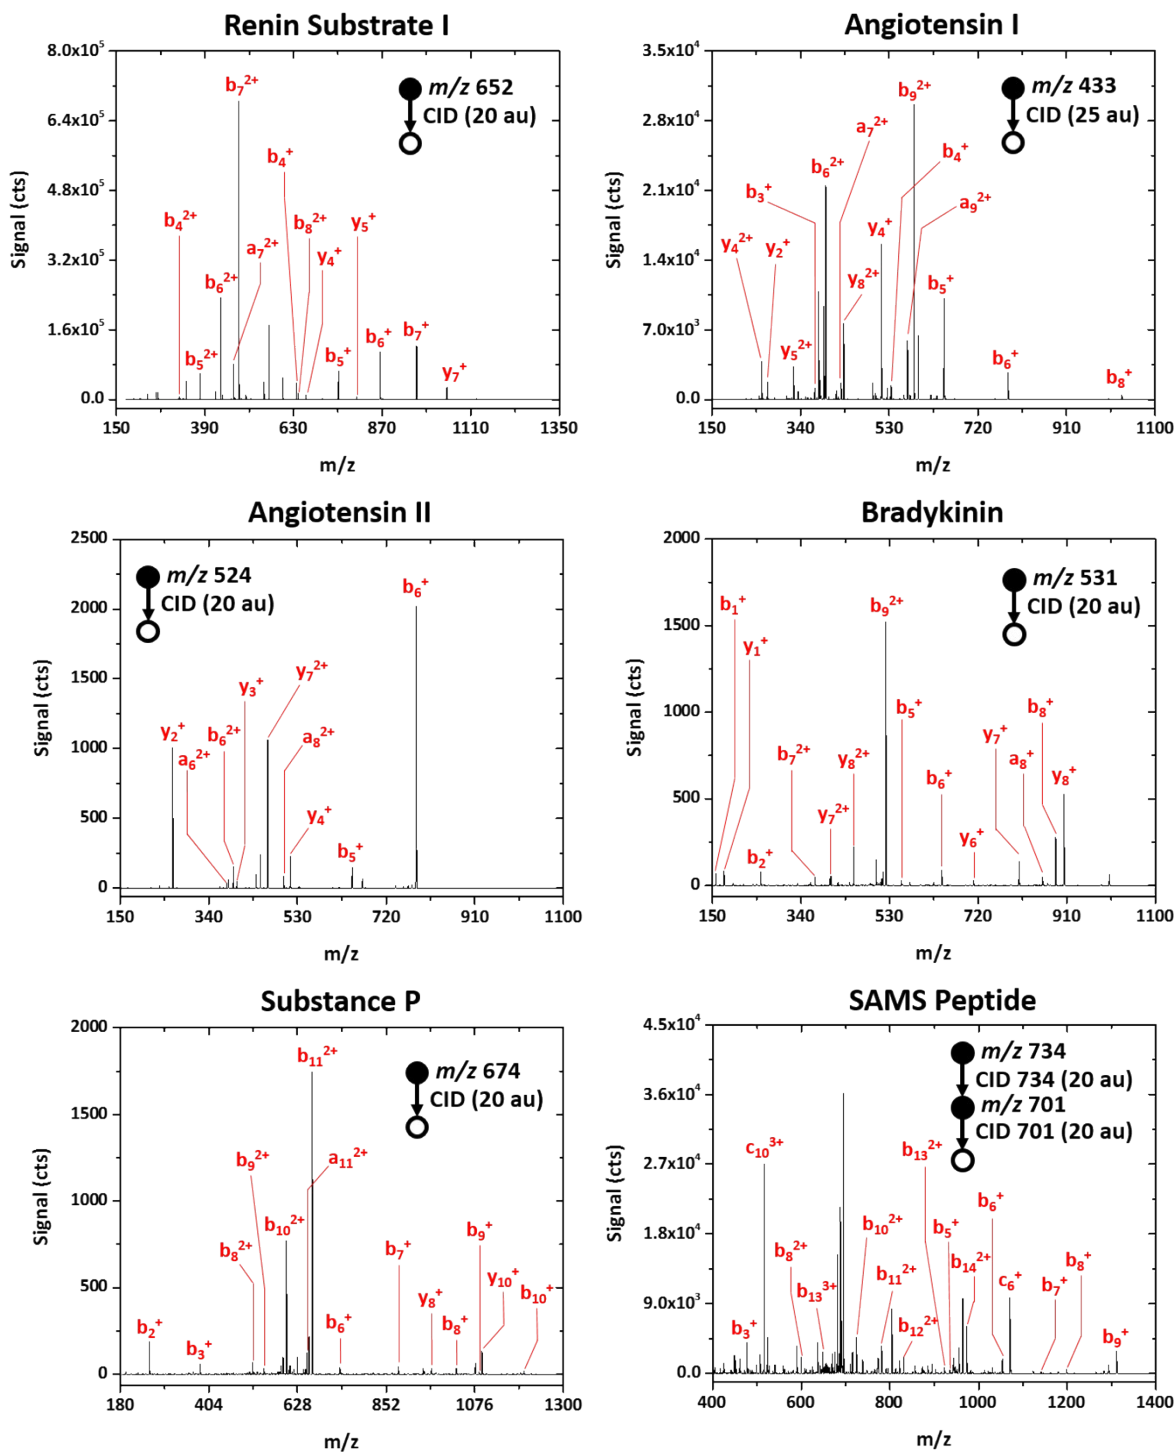

**Figure S3.** MS/MS spectra of various peptides obtained with ESI-CID. For each peptide, the target parent ion was the doubly protonated, doubly charged molecular ion, except in the case of angiotensin I and SAMS peptide, where the triply protonated, triply charged precursor was selected. Sequence coverage, compared to SCGD-MS, is summarized in Table 1.
